# Supplementary material for: Impact of a fixed price system on the supply of institutional long-term care: a comparative study of Japanese and German metropolitan areas
Source: PubMed Central journal article supplement (PMC3937099; doi:10.1186/1472-6963-14-48), 2014-02-01
Supplement: 1472-6963-14-48-S1.pdf [file 1472-6963-14-48-S1.pdf]

# Additional file 1. A Market with a Fixed Price under Equilibrium and a Change in Supply with Increasing Costs

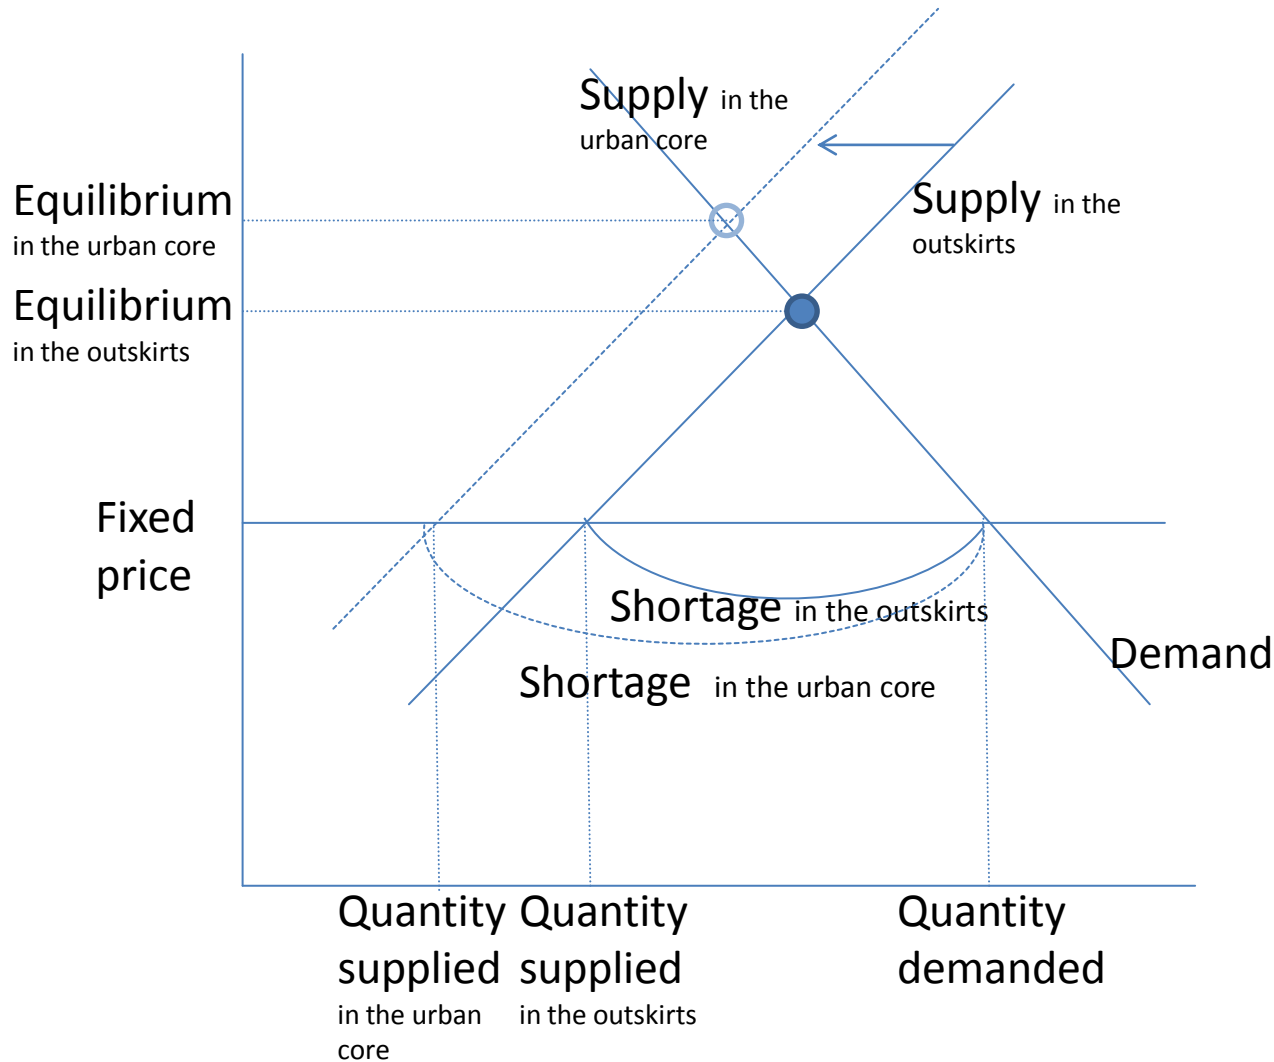

## Reference

Wonderling D, Gruen R, Black N: *Introduction to Health Economics*. Maidenhead: Open University Press; 2010.
