# Supplementary material for: Impact of a fixed price system on the supply of institutional long-term care: a comparative study of Japanese and German metropolitan areas
Source: BMC Health Serv Res. 2014 Feb 1;14:48. doi: 10.1186/1472-6963-14-48 (PMC3937099; doi:10.1186/1472-6963-14-48)
Supplement: Additional file 2 — “Correlation matrix for analysis of overall supply of institutional facilities in Tokyo 2010 (title)” presenting the bivariate correlations as supplementary information to multiple regression analysis. [file 1472-6963-14-48-S2.xlsx]

## Sheet: matrix_jif_2010
Additonal file 2. Correlation matrix for analyis of overall supply of institutional facilties in Tokyo 2010 (n=54)
	Overall bed-densitya of IF	Average facility size	LTA land price	LTA wage of elderly care nurse	Dentisya of subsidized beds	LTA % elderly	LTA growth rate of elderly	LTA residential tax
Average facility size	0.38**
LTA land price	-0.45***	-0.45***
LTA wage of elderly care nurse	-0.05958	-0.121464	0.42**
Dentisya of subsidized beds	-0.314262	-0.42**	0.614682	0.201378
LTA % elderly	0.54***	-0.182361	0.022792	0.029693	0.218275
LTA growth rate of elderly	-0.057923	0.46***	-0.55***	-0.44***	-0.55***	-0.70***
LTA residential tax	-0.295534	-0.41**	0.89***	0.46***	0.537***	0.092768	-0.55***
LTA % elderly needing LTC	-0.50***	-0.47***	0.38**	0.082462	0.42**	0.10625	-0.43***	0.38**
NOTE:
* = p<0.05; ** = p<0.01, *** = p<0.001
a: Bed-density: number of beds per 1000 elderly adults aged 65 and over.
b: Elderly persons: those aged 65 and over.
